# Supplementary material for: Molecular Profiling of Appendiceal Adenocarcinoma and Comparison with Right-sided and Left-sided Colorectal Cancer
Source: Oxford University Press journal article supplement (doi:10.1158/1078-0432.ccr-18-3388), 2019-01-28
Supplement: 10780432ccr183388-sup-210528_2_supp_5254711_pkrhpg.docx [file 10780432ccr183388-sup-210528_2_supp_5254711_pkrhpg.docx]

| **Supplementary Table S2.**  Patients characteristics. | | | | | | | | | | | |
| --- | --- | --- | --- | --- | --- | --- | --- | --- | --- | --- | --- |
| Characteristics | AA and CRC | | | | |  | AA | | | | |
| AA  *N* = 184 | R-CRC  *N* = 994 | L-CRC  *N* = 1080 | *P* value a  AA vs. R-CRC | *P* value a  AA vs. L-CRC |  | NOS  *n* = 46 | PMP  *n* = 66 | MU  *n* = 44 | SR  *n* = 27 | *P* value a |
| Age (median)  (range) | 56 (22-83) | 63 (16-95) | 58 (18-91) | <0.001 | 0.120 |  | 56.5 (22-83) | 56 (30-83) | 61 (25-82) | 54 (32-76) | 0.783 |
| Sex (male/female) | 77/106 | 497/497 | 554/526 | 0.054 | 0.021 |  | 18/28 | 29/37 | 20/24 | 10/17 | 0.862 |
| Location of tumor sampling  (primary/metastatic/unknown) | 50/133/0 | 744/332/4 | 735/255/4 | <0.001 | <0.001 |  | 15/31/0 | 15/51/0 | 11/33/0 | 9/18/0 | 0.581 |
| a *P* value was based on Student’s t-test for continuous variables, and Fisher’s exact test for categorical variables.  AA, appendiceal adenocarcinoma; L-CRC, left-sided colorectal cancer; MU, mucinous adenocarcinoma; NOS, adenocarcinoma, not otherwise specified; PMP, pseudomyxoma peritonei; R-CRC, right-sided colorectal cancer; SR, signet ring cell carcinoma. | | | | | | | | | | | |
